# Supplementary material
Source: publisher figshare collection journal article supplement (https://sage.figshare.com/ndownloader/files/14375459)
Supplement: Supplementary file [file 14375459]

**Supplementary information:**

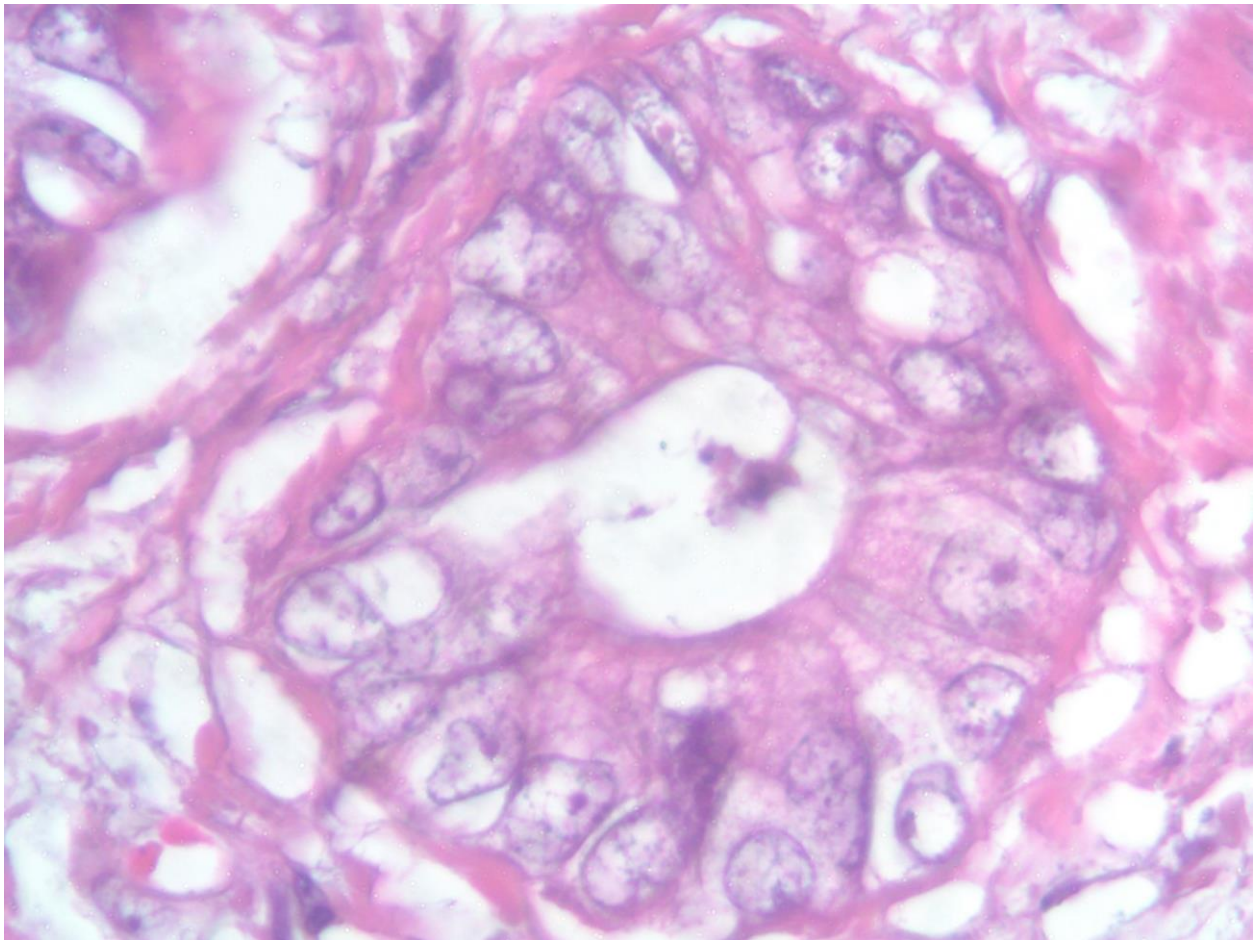

Figure 1: High Power field showing urethra diverticular adenocarcinoma comprised of cells with prominent nucleoli

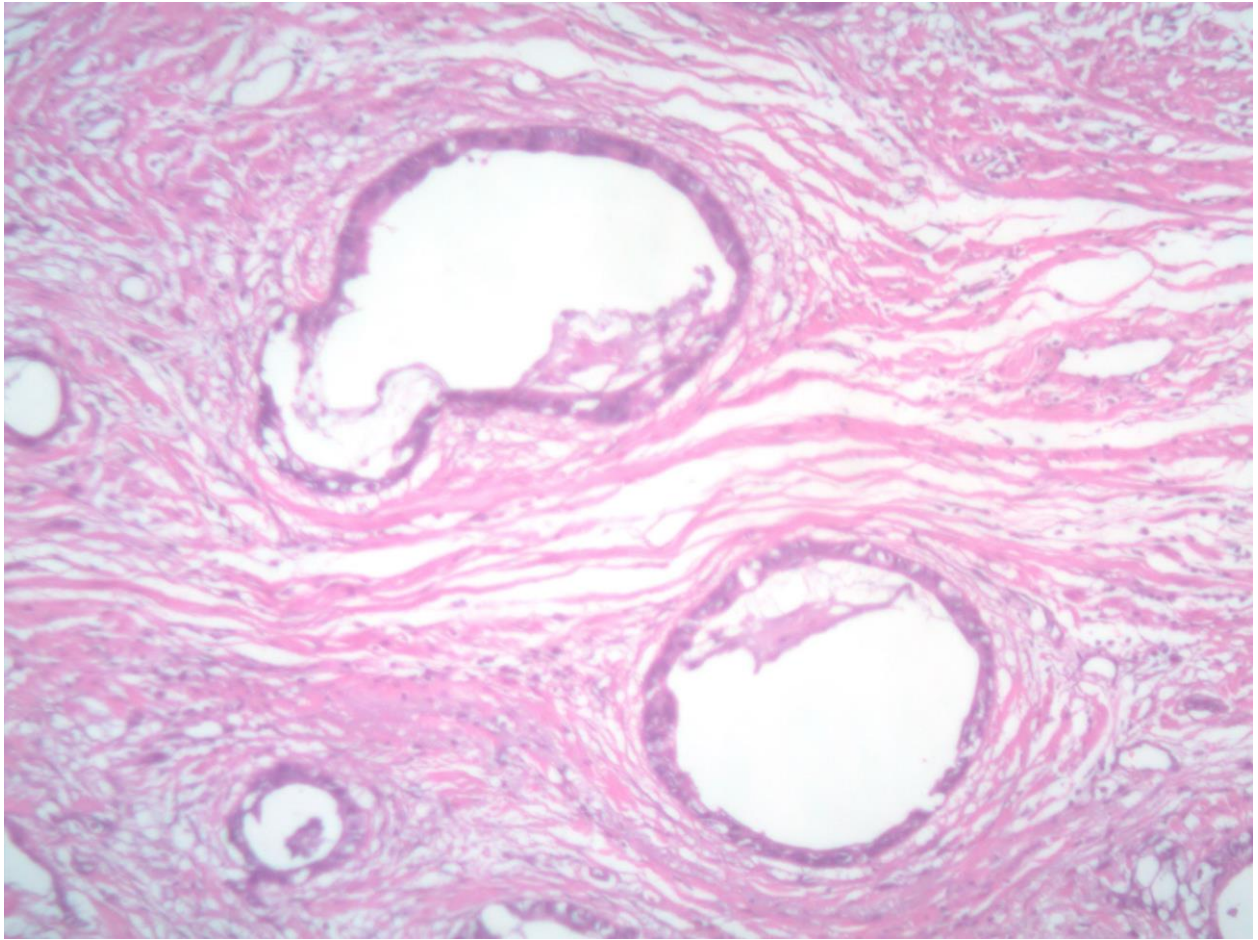

Figure 2: Image showing closer view of mucin in Lumen

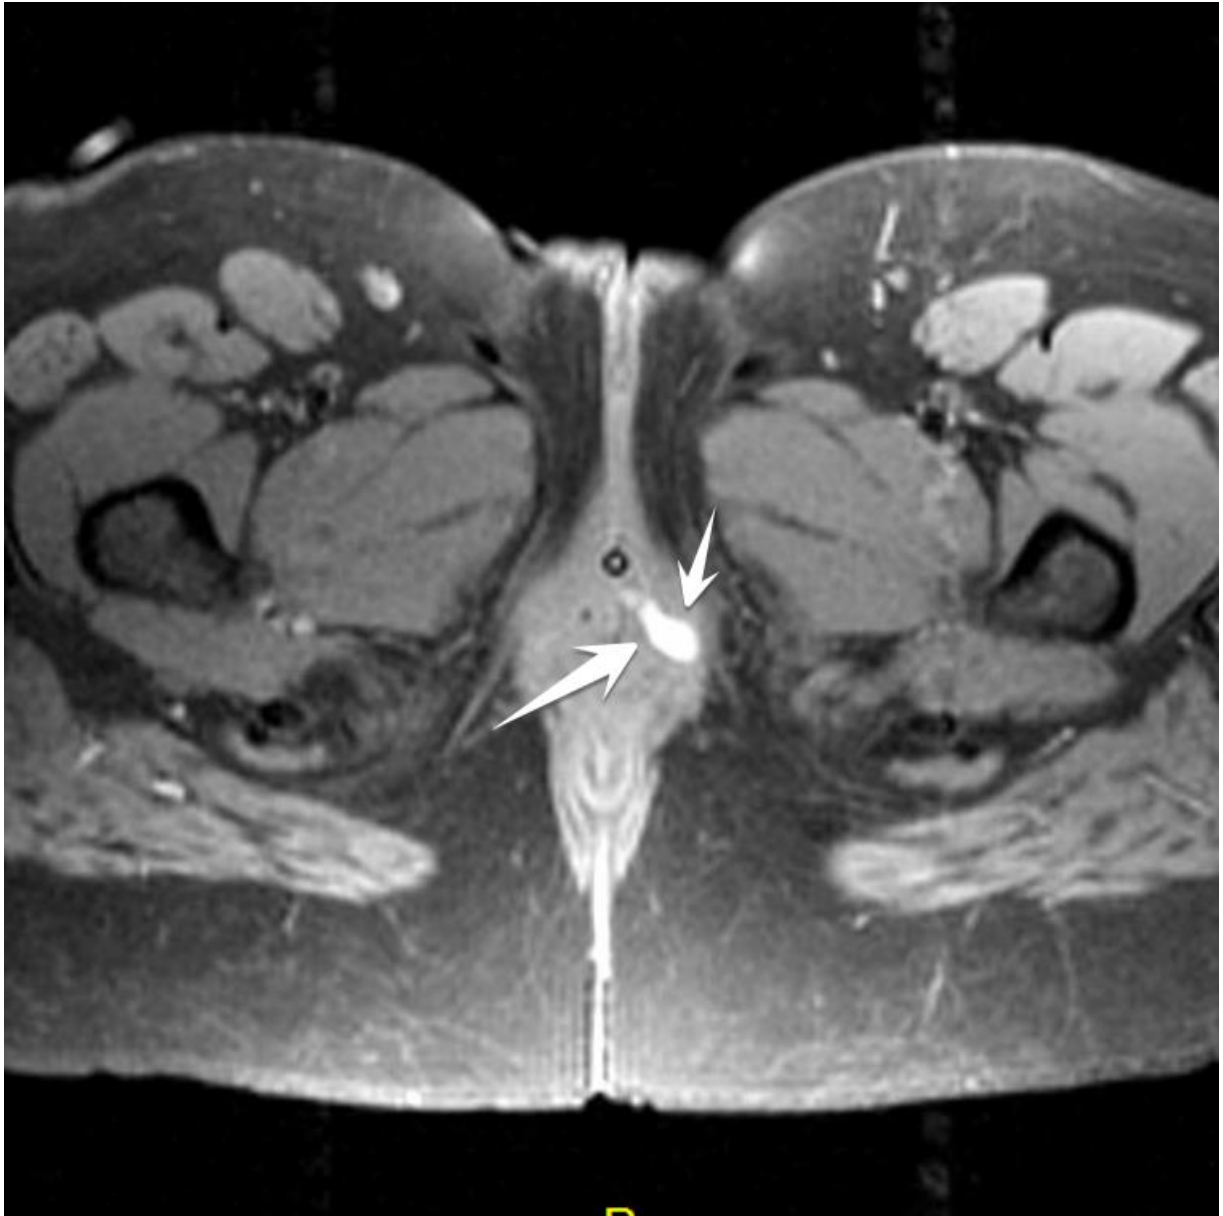

Figure 3: (Transverse View) MRI pelvis with contrast showing peri-urethral diverticula (White arrows)

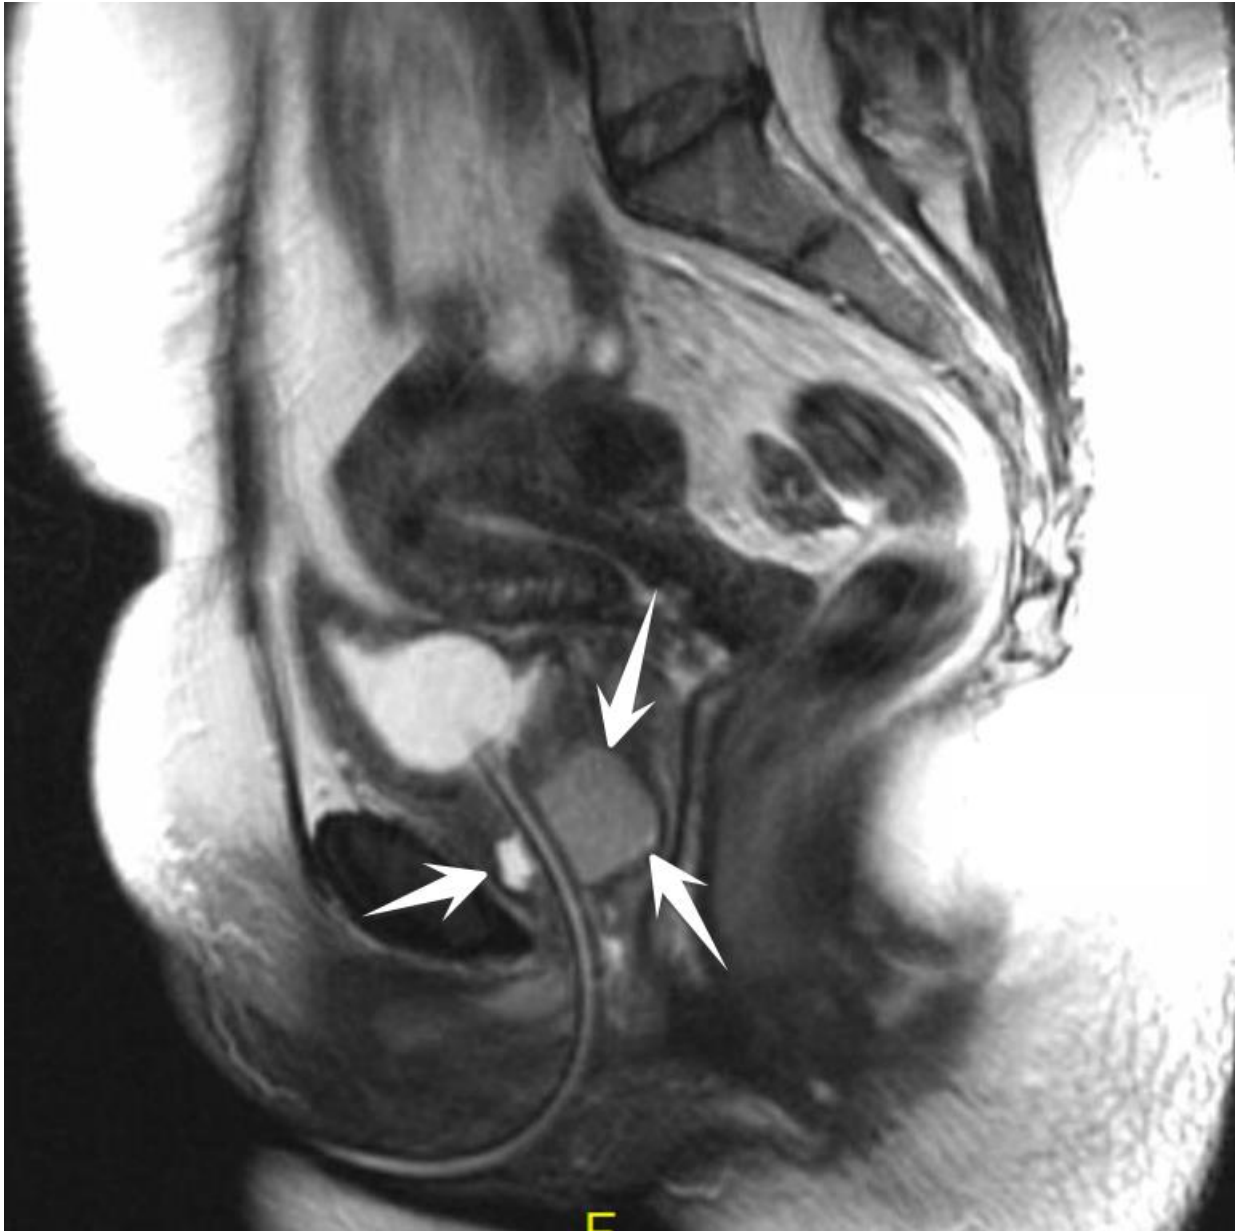

Figure 4: (Sagittal view) MRI pelvis with contrast showing peri-urethral diverticula (White arrows)

| Genomic Findings | FDA-Approved                        | FDA-Approved                      | Potential Clinical |
|------------------|-------------------------------------|-----------------------------------|--------------------|
| Detected         | Therapies (in patient's tumor type) | Therapies (in another tumor type) | Trials             |
|                  |                                     |                                   |                    |

|                                                   |      |      |      |
|---------------------------------------------------|------|------|------|
| CDKN2A/B<br>(Loss)                                | None | None | None |
| Microsatellite status:<br>MS-Stable               | None | None | None |
| Tumor Mutation<br>Burden:<br>TMB-Low;<br>5Muts/Mb | None | None | None |

Table 1: Next Generation Sequencing Results; Note the CDKN loss which indicates the tumor is unlikely to be treated with Palbociclib. Ipilimumab and Nivolumab combinations have shown benefits in cases with high tumor mutation burden (TMB) however in this case the TMB is low.
